# Supplementary material for: stLFRsv: A Germline Structural Variant Analysis Pipeline Using Co-barcoded Reads
Source: Front Genet. 2021 Mar 18;12:636239. doi: 10.3389/fgene.2021.636239 (PMC8012683; doi:10.3389/fgene.2021.636239)
Supplement: Supplementary file 5 [file Table_1.XLSX]

## Sheet: Table1
Supplementary Table 1. Parameter setting for the used pipelines
	Software	Version	Parameters	Data set
short reads	longranger	2.2.2	--lanes=1 --localcores=30 --localmem=150 --vcmode gatk:/../gatk-4.0.7.0/gatk-package-4.0.7.0-local.jar	100X stLFR reads of HG002
	NAIBR	-	min_sv=1000
	grocsv	v0.2.5	"cluster_settings":{ "cluster_type":"multiprocessing", "processes":15 }
	smoove	v0.2.5	-x --exclude /../ceph18.b37.lumpy.exclude.2014-01-15.bed -p 2 --genotype
	stLFRsv*	2.2	-bin 1500 -merge1 4 -size 10000 -gap 10000 -human Y -ncpu 20
	stLFRsv*	2.2	-bin 1500 -merge1 4 -size 10000 -gap 10000 -human Y -ncpu 20	down_sampled_50x of HG002
	stLFRsv*	2.2	-bin 1500 -merge1 4 -size 10000 -gap 10000 -human Y -ncpu 20	down_sampled_30x of HG002
	longranger	2.2.2	--lanes=1 --localcores=30 --localmem=150 --vcmode gatk:/../gatk-4.0.7.0/gatk-package-4.0.7.0-local.jar	40X Linked-read reads of HG001
	NAIBR	-	min_sv=1000
	grocsv	v0.2.5	"cluster_settings":{ "cluster_type":"multiprocessing", "processes":20 }
	stLFRsv*	2.2	-bin 2000 -merge1 3 -size 20000 -gap 10000 -human Y -ncpu 20
	stLFRsv*	2.2	-bin 2000 -merge1 3 -size 10000 -gap 10000 -human Y -ncpu 20	37X Linked-read reads of HX1
long reads	sniffle	1.0.11	--min_support 40 --num_reads_report -1 --genotype --cluster --report-seq	100X Nanopore long reads of HG002
	minimap2	2.17	-ax map-ont
	bwa-mem2	2.0pre1	-R '@RG\tID:L0\tLB:COMPLETE\tSM:L0'	for all stLFR reads data
	truvari	1.3.4	-s=50 --sizemax=200000
* black and control list files (https://github.com/BGI-biotools/stLFRsv/tree/master/data) were used by -bl and -cl parameters. And phase info generated from phase tools (https://github.com/BGI-biotools/stLFRsv/tree/master/tools/gen_phase) was used with -phase parameter.

## Sheet: Table2
Supplementary Table 2. False positive deletions detected by stLFRsv against GIAB HG002 benchmark
Chr	Pos	SV type	Marker	Profile	Genotype	Overlap with GIAB records	Overlap ratio
1	47362500	<DEL>	COMMON	END=47536500;SVTYPE=DEL;SVLEN=-174000	1|1
1	72766252	<DEL>	COMMON	END=72811840;SVTYPE=DEL;SVLEN=-45588	0|1	1 72766323 72811839 45516 DEL ClusteredCalls	1
1	81403500	<DEL>	PASS	END=81415500;SVTYPE=DEL;SVLEN=-12000	1|1	1 81404757 81410948 6191 DEL PASS	0.52
1	169222500	<DEL>	COMMON	END=169248000;SVTYPE=DEL;SVLEN=-25500	1|0	1 169222618 169244741 22123 DEL LongReadHomRef	0.87
1	196734000	<DEL>	COMMON	END=196807500;SVTYPE=DEL;SVLEN=-73500	0|1	1 196714626 196799309 84683 DEL LongReadHomRef 1 196758763 196883676 124913 DEL LongReadHomRef	0.77 0.39
2	1216500	<DEL>	PASS	END=1228500;SVTYPE=DEL;SVLEN=-12000	0|1	2 1218111 1226373 7994 DEL ClusteredCalls	0.69
3	68736000	<DEL>	PASS	END=68749500;SVTYPE=DEL;SVLEN=-13500	1|1	3 68739683 68747858 8175 DEL PASS	0.61
3	75567000	<DEL>	PASS	END=75595500;SVTYPE=DEL;SVLEN=-28500	0|1
3	129763330	<DEL>	COMMON	END=129806746;SVTYPE=DEL;SVLEN=-43416	1|0	3 129763380 129806745 43365 DEL NoConsensusGT	1
4	9456000	<DEL>	COMMON	END=9483000;SVTYPE=DEL;SVLEN=-27000	0|1	4 9452493 9476819 24326 DEL LongReadHomRef	0.77
4	69373670	<DEL>	COMMON	END=69491193;SVTYPE=DEL;SVLEN=-117523	1|0	4 69370648 69487949 117301 DEL LongReadHomRef	0.97
4	159273000	<DEL>	PASS	END=159286500;SVTYPE=DEL;SVLEN=-13500	0|1	4 159274254 159284292 8380 DEL PASS	0.74
4	167673000	<DEL>	PASS	END=167685000;SVTYPE=DEL;SVLEN=-12000	1|1	4 167677025 167683060 6035 DEL PASS	0.5
4	187878000	<DEL>	PASS	END=187896000;SVTYPE=DEL;SVLEN=-18000	1|0	4 187880463 187888423 7960 DEL NoConsensusGT	0.44
5	745500	<DEL>	COMMON	END=826500;SVTYPE=DEL;SVLEN=-81000	1|0	5 711734 795906 84172 DEL NoConsensusGT	0.6
5	57676500	<DEL>	PASS	END=57688500;SVTYPE=DEL;SVLEN=-12000	1|1	5 57679986 57686095 6109 DEL PASS	0.51
5	155475000	<DEL>	PASS	END=155496000;SVTYPE=DEL;SVLEN=-21000	0|1	5 155474830 155488939 14109 DEL LongReadHomRef	0.66
6	19761000	<DEL>	PASS	END=19773000;SVTYPE=DEL;SVLEN=-12000	0|1	6 19765106 19771184 6078 DEL PASS	0.51
6	78424500	<DEL>	PASS	END=78438000;SVTYPE=DEL;SVLEN=-13500	1|0	6 78426661 78435123 8462 DEL PASS	0.63
6	86706000	<DEL>	PASS	END=86718000;SVTYPE=DEL;SVLEN=-12000	1|1	6 86708739 86714791 6052 DEL ClusteredCalls	0.5
7	38386500	<DEL>	PASS	END=38400000;SVTYPE=DEL;SVLEN=-13500	1|0	7 38385673 38394814 9141 DEL LongReadHomRef	0.62
7	97392000	<DEL>	PASS	END=97404000;SVTYPE=DEL;SVLEN=-12000	1|1	7 97395304 97402639 7335 DEL NoConsensusGT	0.61
8	1339500	<DEL>	COMMON	END=1357500;SVTYPE=DEL;SVLEN=-18000	1|1	8 1341179 1354410 13231 DEL NoConsensusGT 8 1343263 1351536 8273 DEL LongReadHomRef	0.74 0.46
8	24972375	<DEL>	COMMON	END=24990944;SVTYPE=DEL;SVLEN=-18569	0|1	8 24972432 24990943 18511 DEL ClusteredCalls	1
10	6408000	<DEL>	PASS	END=6421500;SVTYPE=DEL;SVLEN=-13500	1|1	10 6411563 6417629 6066 DEL PASS	0.45
10	111570000	<DEL>	PASS	END=111582000;SVTYPE=DEL;SVLEN=-12000	1|1	10 111572110 111578216 6106 DEL PASS	0.51
11	93150000	<DEL>	PASS	END=93162000;SVTYPE=DEL;SVLEN=-12000	1|1	11 93154136 93160197 6061 DEL PASS	0.51
11	95166000	<DEL>	PASS	END=95178000;SVTYPE=DEL;SVLEN=-12000	1|1	11 95169369 95175420 6051 DEL PASS	0.5
12	8538000	<DEL>	COMMON	END=8592000;SVTYPE=DEL;SVLEN=-54000	0|1	12 8541659 8548889 7230 DEL LongReadHomRef 12 8558484 8568224 9740 DEL NoConsensusGT 12 8558485 8590846 32361 DEL NoConsensusGT	0.13 0.18 0.60
12	8558413	<DEL>	PASS	END=8590847;SVTYPE=DEL;SVLEN=-32434	1|1	12 8558484 8568224 9740 DEL NoConsensusGT 12 8558485 8590846 32361 DEL NoConsensusGT	0.3 1.00
12	9630000	<DEL>	COMMON	END=9736500;SVTYPE=DEL;SVLEN=-106500	0|1	12 9632915 9732036 96158 DEL NoConsensusGT	0.93
12	11216856	<DEL>	COMMON	END=11247708;SVTYPE=DEL;SVLEN=-30852	1|1	12 11192444 11218061 25617 DEL LongReadHomRef 12 11219200 11250749 5545 DEL NoConsensusGT	0.04 0.90
12	13543500	<DEL>	PASS	END=13555500;SVTYPE=DEL;SVLEN=-12000	1|1	12 13545544 13551618 6074 DEL PASS	0.51
15	84832500	<DEL>	COMMON	END=84916500;SVTYPE=DEL;SVLEN=-84000	1|1	15 84834155 84913077 78922 DEL NoConsensusGT	0.94
16	2634000	<DEL>	COMMON	END=2667000;SVTYPE=DEL;SVLEN=-33000	1|1
16	28479000	<DEL>	COMMON	END=28659000;SVTYPE=DEL;SVLEN=-180000	1|1	16 28606621 28619545 12924 DEL LongReadHomRef	0.07
19	21822000	<DEL>	PASS	END=21835500;SVTYPE=DEL;SVLEN=-13500	0|1
19	35850000	<DEL>	PASS	END=35863500;SVTYPE=DEL;SVLEN=-13500	0|1	19 35849137 35861603 12466 DEL LongReadHomRef	0.86
19	43699500	<DEL>	COMMON	END=43767000;SVTYPE=DEL;SVLEN=-67500	1|0	19 43244003 43790123 546120 DEL LongReadHomRef 19 43701473 43765338 63865 DEL NoConsensusGT	0.12 0.95
19	53515500	<DEL>	PASS	END=53554500;SVTYPE=DEL;SVLEN=-39000	1|0	19 53516912 53552060 35148 DEL NoConsensusGT	0.9
20	1555500	<DEL>	COMMON	END=1587000;SVTYPE=DEL;SVLEN=-31500	1|1	20 1552309 1585333 33024 DEL NoConsensusGT	0.9
X	154788000	<DEL>	PASS	END=154804500;SVTYPE=DEL;SVLEN=-16500	1|1	X 154790189 154803271 13082 DEL ClusteredCalls	0.79

## Sheet: Table3
Supplementary Table 3. False positive inversions, duplications and translocations detected by stLFRsv on HG002
EventID	SvID	BreakID1	BreakID2	ChrA	PosA	ChrB	PosB	ShareBarcode	RealType	SimpleType	QualityScore	ComprehensiveFilter
S1	13	2446	88	1	685500	11	133500	66	RL	TRA1	36	PASS|COMMON
S1	8	2446	47	1	685500	19	207000	50	RL	TRA1	36	PASS|COMMON
S2	21	126	127	1	1569000	1	1632000	42	LL	INV1	50	PASS|COMMON
S8	44	217	218	1	39978000	1	40239000	43	LR	DUP	53	PASS|COMMON
S16	61	252	254	1	104182500	1	104277000	81	LL	INV1	36	PASS|COMMON
S33	1673	3885	3886	1	161557500	1	161643000	63	RR	INV2	50	PASS|COMMON
S40	213	719	720	1	248574000	1	248797500	59	LL	INV1	36	PASS|COMMON
S51	230	750	751	2	86940000	2	87282000	30	LL	INV1	50	PASS|COMMON
S52	232	752	754	2	87129000	X	143161500	43	LL	TRA3	36	PASS|COMMON
S52	1592	755	3716	2	87166500	X	143163000	65	RL	TRA1	36	PASS|COMMON
S52	1593	3717	3716	2	88260000	X	143163000	44	RL	TRA1	36	PASS|COMMON
S65	1680	3908	894	2	96462000	2	96733500	28	RR	INV2	45	PASS|COMMON
S65	291	894	3909	2	96733500	2	98232000	53	RR	INV2	45	PASS|COMMON
S67	1681	3910	3911	2	110610000	2	111309000	29	RR	INV2	36	PASS|COMMON
S67	1683	3914	3915	2	111307500	2	113164500	82	RR	INV2	36	PASS|COMMON
S71	1684	3916	939	2	111325500	2	113179500	87	RR	INV2	36	PASS|COMMON
S71	1685	3917	921	2	111387000	2	113185500	30	RR	INV2	50	PASS
S87	335	1002	997	3	195675000	3	197391000	63	LR	DUP	36	PASS
S106	387	1132	3928	5	745500	5	844500	59	RR	INV2	52	PASS|COMMON
S109	1695	3936	3937	5	68910000	5	69766500	112	RR	INV2	36	PASS|COMMON
S113	418	1204	1206	5	69148500	5	70576500	94	LR	DUP	36	PASS|COMMON
S113	472	1313	1206	5	70053000	5	70576500	61	RR	INV2	36	PASS|COMMON
S130	482	1332	1333	5	175332000	5	177361500	50	LR	DUP	48	PASS|COMMON
S131	18	102	1358	5	180870000	17	81157500	51	LL	TRA3	36	PASS|COMMON
S134	508	1384	1385	6	26670953	6	26796326	90	LL	INV1	36	PASS|COMMON
S134	1708	3964	3965	6	26737500	6	26797500	52	RR	INV2	36	PASS|COMMON
S204	787	2011	2014	9	44284500	9	46725000	93	LL	INV1	36	PASS|COMMON
S225	950	2392	2333	10	48819000	10	49339500	82	LL	INV1	36	PASS|COMMON
S228	935	2357	4079	10	47020500	10	47058000	152	RR	INV2	44	PASS|COMMON
S239	1751	4087	4088	11	1912500	11	1959000	48	RR	INV2	44	PASS|COMMON
S239	973	2456	2457	11	1917000	11	1962000	59	LL	INV1	53	PASS|COMMON
S252	993	2496	2497	12	9438000	12	9630000	74	LR	DUP	50	PASS
S252	992	2494	2495	12	9439500	12	9735000	50	LL	INV1	50	PASS
S252	994	2498	2499	12	9594000	12	9631500	51	LR	DUP	50	PASS|COMMON
S256	1752	4091	4092	12	17920500	12	18009000	114	RR	INV2	53	PASS|COMMON
S256	999	2507	2508	12	17925000	12	18015000	109	LL	INV1	50	PASS|COMMON
S262	1007	2521	4093	12	131794500	12	132147000	58	RR	INV2	53	PASS|COMMON
S264	1753	4094	4095	13	52879500	13	53094000	74	RR	INV2	50	PASS|COMMON
S283	1175	2797	2798	15	23302500	15	28909500	54	LR	DUP	36	PASS|COMMON
S286	1213	2878	2879	15	43852500	15	43953000	86	LL	INV1	36	PASS|COMMON
S292	1233	2931	2932	15	82969500	15	83146500	56	LR	DUP	36	PASS|COMMON
S298	1776	4137	3046	16	15010981	16	15124178	116	RR	INV2	83	PASS|COMMON
S309	1339	3120	3121	16	28354500	16	28657500	67	LL	INV1	36	PASS|COMMON
S310	1340	3129	3131	16	28429500	16	28821000	76	LR	DUP	42	PASS|COMMON
S310	1791	4167	3131	16	28707000	16	28821000	76	RR	INV2	50	PASS|COMMON
S311	1789	4164	3130	16	28458000	16	28705500	55	RR	INV2	36	PASS|COMMON
S316	1362	3175	3177	16	32203500	16	32749500	89	LR	DUP	36	PASS|COMMON
S320	1398	3232	4173	16	32695500	16	33258000	48	RR	INV2	36	PASS|COMMON
S322	1391	3219	3220	16	32959500	16	33670500	42	LL	INV1	36	PASS|COMMON
S323	1794	4177	4178	16	70006500	16	74460000	57	RR	INV2	50	PASS|COMMON
S327	1418	3264	3263	17	18297000	17	20458500	61	LR	DUP	50	PASS|COMMON
S328	1428	3278	3279	17	18930000	17	19138500	50	LR	DUP	36	PASS|COMMON
S337	1471	3396	3397	18	10606500	18	12210000	30	LL	INV1	44	PASS|COMMON
S337	1472	3396	3398	18	10606500	18	12229500	37	LR	DUP	52	PASS|COMMON
S367	1615	3749	3748	X	2699464	Y	2649521	88	RL	TRA1	65	PASS|COMMON

## Sheet: Table4
Supplementary Table 4. Deletions not detected by stLFRsv but detected by other callers on HG002
	Chr	StartPos	EndPos	Length	Detected in stLFRsv	Overlap with GIAB records
Longranger	2	89132285	89159209	26924	BAD_REGION, COMMON	PASS
	2	179301046	179312226	11180	None	LongReadHomRef
	4	59720000	59890000	170000	BAD_REGION, COMMON	None
	4	70122955	70232028	109073	None	LongReadHomRef
	6	68101533	68112164	10631	None	LongReadHomRef
	8	8032452	8045361	12909	BAD_REGION, COMMON	None
	9	141019500	141033681	14181	BAD_REGION	NoConsensusGT
	10	42701490	42716826	15336	None	NoConsensusGT
	11	51341203	51362971	21768	BAD_REGION, COMMON	NoConsensusGT
	14	106330847	106352170	21323	None	LongReadHomRef, NoConsensusGT
	15	22373082	22383649	10567	BAD_REGION	NoConsensusGT
	22	24341418	24398517	57099	None	NoConsensusGT
GROC-SVs	2	89132282	89159120	26838	BAD_REGION, COMMON	PASS
	6	26711244	26754805	43561	COMMON	None
	11	55365428	55431549	66121	None	None
	17	36350387	36399833	49446	None	NoConsensusGT
	22	24343030	24397759	54729	None	NoConsensusGT
NAIBR	1	16840522	16993507	152985	None	None
	1	144896163	144906909	10746	None	LongReadHomRef, NoConsensusGT
	1	145080062	145189561	109499	None	LongReadHomRef
	2	179517519	179528167	10648	None	None
	5	682445	774694	92249	BAD_REGION, COMMON	None
	6	32446479	32534485	88006	BAD_REGION, COMMON	LongReadHomRef, NoConsensusGT
	6	32449535	32493614	44079	BAD_REGION, COMMON	LongReadHomRef, NoConsensusGT
	6	32454279	32514267	59988	BAD_REGION, COMMON	LongReadHomRef, NoConsensusGT
	6	32457279	32504035	46756	BAD_REGION, COMMON	LongReadHomRef, NoConsensusGT
	6	32469319	32507750	38431	BAD_REGION, COMMON	LongReadHomRef, NoConsensusGT
	6	32481981	32544319	62338	BAD_REGION, COMMON	LongReadHomRef, NoConsensusGT
	6	32494866	32538721	43855	BAD_REGION, COMMON	LongReadHomRef, NoConsensusGT
	7	100555936	100607320	51384	BAD_REGION, COMMON	None
	8	6833342	6872037	38695	None	LongReadHomRef
	9	141019398	141033794	14396	BAD_REGION	NoConsensusGT
	11	51341103	51363072	21969	BAD_REGION, COMMON	NoConsensusGT
	14	106239692	106325357	85665	None	LongReadHomRef
	14	106330697	106351993	21296	None	LongReadHomRef, NoConsensusGT
	15	22372979	22383752	10773	BAD_REGION	NoConsensusGT
	22	23101429	23247388	145959	None	ClusteredCalls, NoConsensusGT
	22	24274044	24311462	37418	None	NoConsensusGT
	X	7623761	7673982	50221	BAD_REGION, COMMON	PASS
	X	10738512	10788827	50315	BAD_REGION, COMMON	PASS

## Sheet: Table5
Supplementary Table 5. Down sampled deletion evaluation on whole genome against GIAB HG002 benchmark
		stLFRsv	stLFRsv	stLFRsv	stLFRsv+smoove	stLFRsv+smoove	stLFRsv+smoove
	Coverage	30X	50X	100X	30X	50X	100X
50-1k	Benchmark	4719
	Total-call	0	0	0	359	649	972
	True positive	0	0	0	276	490	724
	False positive	0	0	0	83	159	248
	False negative	4719	4719	4719	4443	4229	3995
	Precision	-	-	-	0.768802	0.755008	0.744856
	Recall	-	-	-	0.058487	0.103836	0.153422
1k-10k	Benchmark	577
	Total-call	5	11	13	403	506	556
	True positive	4	10	12	325	408	436
	False positive	1	1	1	78	98	120
	False negative	573	567	565	252	169	141
	Precision	0.8	0.909091	0.923077	0.806452	0.806324	0.784173
	Recall	0.00693241	0.017331	0.0207972	0.563258	0.707106	0.755633
10k-30k	Benchmark	31
	Total-call	59	57	56	58	57	56
	True positive	18	26	30	18	26	30
	False positive	41	31	26	40	31	26
	False negative	13	5	1	13	5	1
	Precision	0.305085	0.45614	0.535714	0.310345	0.45614	0.535714
	Recall	0.580645	0.83871	0.967742	0.580645	0.83871	0.967742
>30k	Benchmark	9
	Total-call	12	20	23	12	19	23
	True positive	3	7	7	3	7	7
	False positive	9	13	16	9	12	16
	False negative	6	2	2	6	2	2
	Precision	0.25	0.35	0.304348	0.25	0.368421	0.304348
	Recall	0.333333	0.777778	0.777778	0.333333	0.777778	0.777778

## Sheet: Table6
Supplementary Table 6. Insertion evaluation for Nanopore long reads on HG002
	Benchmark	Total-call	True positive	False positive	False negative	Precision	Recall
50-1k	6232	12410	4882	7528	1350	0.393392	0.783376
1k-10k	909	1293	699	594	210	0.540603	0.768977
10k-30k	25	7	5	2	20	0.714286	0.2
>30k	6	0	0	0	6	-	-
All	7172	13710	5586	8124	1586	0.7789	0.4074

## Sheet: Table7
Supplementary Table 7. Three call sets on HG001 Linked-read data against Long Ranger call set
SV type	Longranger call set	checked by heatmap	SV caller	overlaped with Longranger call set	not overlaped with Longranger call set
Deletion	18	17	stLFRsv*	17	9(1)
			NAIBR	15	214
			GROC-SVs	6	10
Duplication	12	4	stLFRsv*	0	3(0)
			NAIBR	1	316
			GROC-SVs	0	2
Inversion	4	4	stLFRsv*	4	7(3)
			NAIBR	2	435
			GROC-SVs	0	13
* for the exclusive SVs in stLFRsv set, SVs marked with "PASS" were counted in the bracket.

## Sheet: Table8
Supplementary Table 8. Deletions of HX1 detected by stLFRsv against SMRT-SV call set
Chr	StartPos	EndPos	Length	SV id	Detected in stLFRsv
1	241355371	241370913	15542	nssv14502371	PASS
2	36332517	36342910	10393	nssv14622271	NONE
2	146862621	146876863	14242	nssv14637721	PASS|COMMON
3	56607728	56621584	13856	nssv14661382	PASS
3	89531433	89547076	15643	nssv14687215	PASS
3	192875330	192885405	10075	nssv14689440	PASS
5	57323478	57333779	10301	nssv14692153	NONE
6	31219519	31229792	10273	nssv14718633	PASS
6	74592062	74602440	10378	nssv14712989	PASS
6	77016711	77029160	12449	nssv14719968	PASS
8	32680007	32691262	11255	nssv14765873	NONE
8	144700485	144714692	14207	nssv14775446	PASS
9	23362802	23377683	14881	nssv14779540	NONE
11	107236642	107247581	10939	nssv14525868	NONE
12	33385072	33398266	13194	nssv14521709	PASS|COMMON
13	58589142	58599791	10649	nssv14550620	NONE
